# Supplementary material for: Steroid profiling using liquid chromatography mass spectrometry during adrenal vein sampling in patients with primary bilateral macronodular adrenocortical hyperplasia
Source: PubMed Central journal article supplement (PMC9763872; doi:10.3389/fendo.2022.1079508), 2022-12-06
Supplement: DataSheet_1.pdf [file DataSheet_1.pdf]

Supplementary data from:

**Steroid profiling using liquid chromatography mass spectrometry during adrenal vein sampling in patients with primary bilateral macronodular adrenocortical hyperplasia (PBMAH)**

Ru Zhang†, German Rubinstein†, Sharmilee Vetrivel, Sonja Kunz, Frederick Vogel, Lucas Bouys, Jérôme Bertherat, Matthias Kroiss, Sinan Deniz, Andrea Osswald, Thomas Knösel, Martin Bidlingmaier, Silviu Sbiera, Martin Reincke, Anna Riester\*

The associated article has been submitted to the *Frontiers in Endocrinology*. Please cite the original article when using these data.

## Supplementary Material

### 1 Supplementary Figures

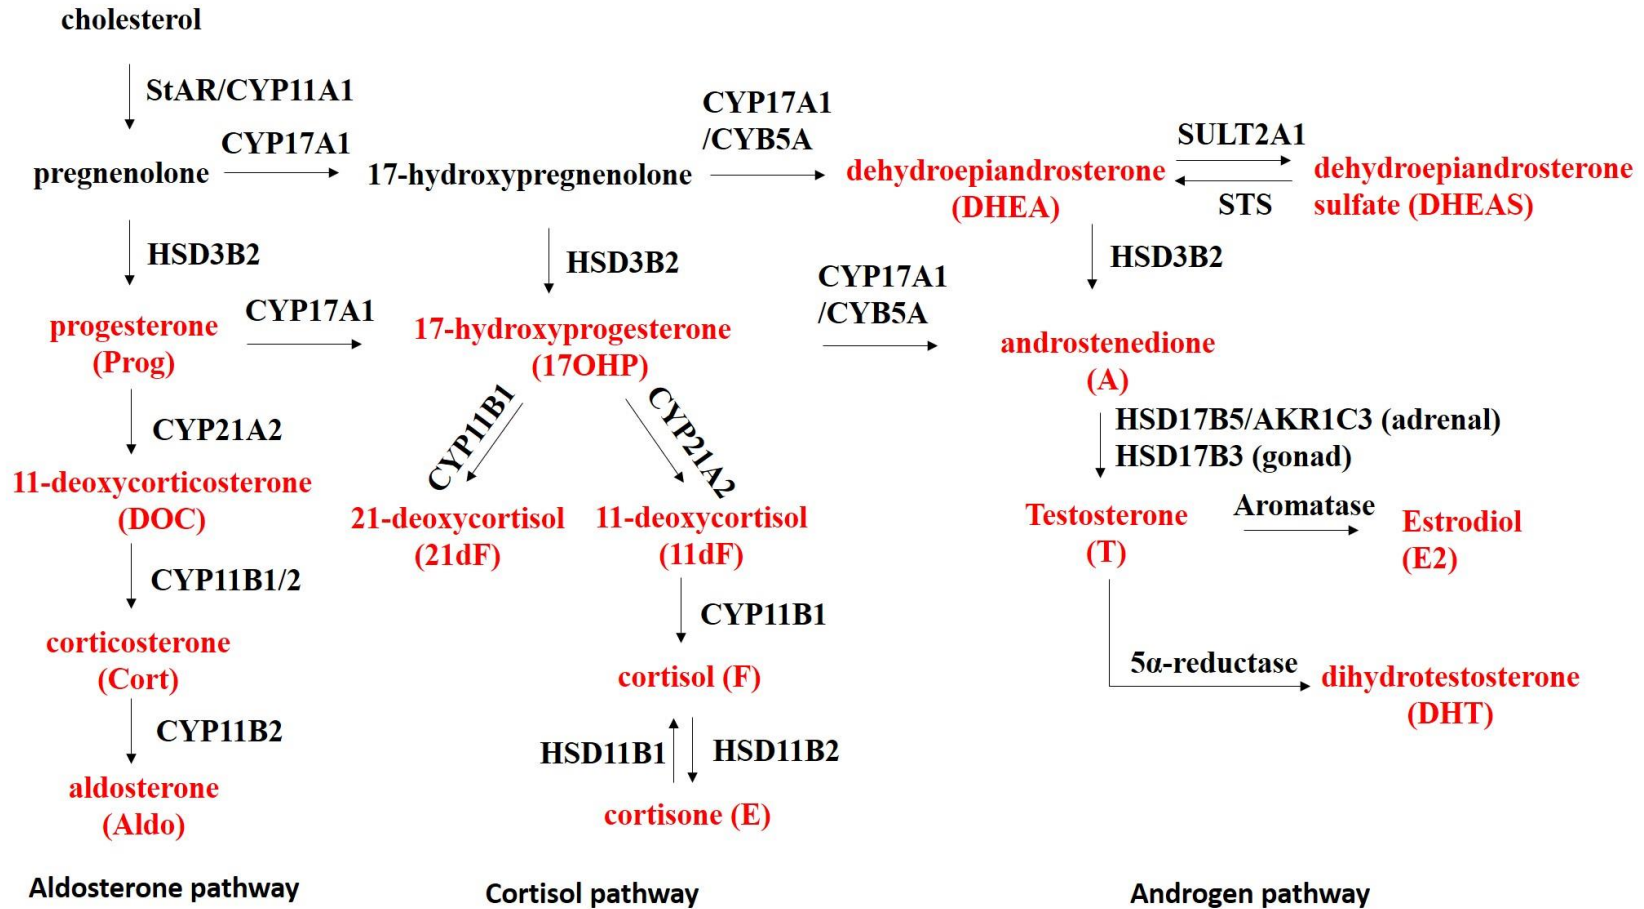

**Figure S1.** The pathway of adrenal steroidogenesis. The steroids in red are those we quantified.

## 2 Supplementary Tables

**Table S1. Low limit of quantification and up limit of quantification of LC-MS/MS (ng/ml).**

| Pat. Nr. |      | Aldosterone | Cortisol | Cortisone | Corticosterone | 11-<br>deoxycortisol | 21-<br>deoxycortisol | DHEAS | Estradiol | Testosterone | Androstenedione | DHEA  | DHT   | 17-<br>hydroxyprogesterone | 11-<br>Deoxycorticosterone | Progesterone |
|----------|------|-------------|----------|-----------|----------------|----------------------|----------------------|-------|-----------|--------------|-----------------|-------|-------|----------------------------|----------------------------|--------------|
| 1-9      | LLOQ | 0.014       | 1.52     | 0.148     | 0.175          | 0.03                 | 0.027                | 24.4  | 0.026     | 0.005        | 0.022           | 0.229 | 0.042 | 0.04                       | 0.023                      | 0.03         |
|          | ULPQ | 6           | 12000    | 80        | 2000           | 600                  | 10                   | 18000 | 10        | 24           | 600             | 120   | 3     | 600                        | 120                        | 45           |
| 10-16    | LLOQ | 0.028       | 1.225    | 0.102     | 0.08           | 0.144                | 0.042                | 14.4  | 0.004     | 0.01         | 0.032           | 0.213 | 0.081 | 0.015                      | 0.008                      | 0.035        |
|          | ULPQ | 2.93        | 291      | 41        | 45.7           | 15.6                 | 5.25                 | 5944  | 5.14      | 12           | 13.9            | 58.2  | 1.43  | 14.7                       | 2.95                       | 25.7         |

**Table S2. Demographic and clinical characteristics.**

| Patient No. | Sex | Age (at diagnosis) | Clinical presentation | LDDST [µg/dl] | UFC [µg/24h] | LNSLC [ng/ml] | ACTH [pg/ml] | Adrenal size on imaging |             |             |             | ARMC5 Status |
|-------------|-----|--------------------|-----------------------|---------------|--------------|---------------|--------------|-------------------------|-------------|-------------|-------------|--------------|
|             |     |                    |                       |               |              |               |              | Left                    |             | Right       |             |              |
|             |     |                    |                       |               |              |               |              | WxDxH [cm]              | Volume [ml] | WxDxH [cm]  | Volume [ml] |              |
| 1           | F   | 58                 | Overt CS              | 7.6           | 410          | 7.9           | 2.5          | 2.8x5.1x4.2             | 60          | 5.5x4.9x5.1 | 137.4       | WT           |
| 2           | F   | 60                 | Overt CS              | 5.6           | 169          | 2.3           | 9            | 2.6x5x4.2               | 54.6        | 2.3x4.3x5.6 | 55.4        | WT           |
| 3           | F   | 56                 | Overt CS              | 15.1          | 207          | NA            | <5           | 5x4.8x5.8               | 139.2       | 3.5x3.9x4.5 | 61.4        | WT           |
| 4           | M   | 48                 | Overt CS              | 33.7          | 847          | 10.3          | 3            | 8.2x10.5x9.9            | 852.4       | 4.7x3.9x6.3 | 115.5       | MUT          |
| 5           | F   | 58                 | Overt CS              | 4.1           | 222          | 3.3           | <2           | 2.2x3.4x4               | 29.9        | 3.7x4.8x5.3 | 94.1        | WT           |
| 6           | F   | 38                 | Overt CS              | 14.5          | 324          | 5.9           | 3            | 4x1.3x4.4               | 22.9        | 1.4x3.5x4.9 | 24          | WT           |
| 7           | F   | 72                 | Overt CS              | 3.1           | 322          | 0.7           | 4            | 3x2.3x4.1               | 28.3        | 1.8x2.1x2.5 | 9.5         | NA           |
| 8           | F   | 50                 | Overt CS              | 13.2          | NA           | 5.3           | 2            | 2.6x3.3x1.9             | 16.3        | 1.5x3.5x3.7 | 19.4        | MUT          |
| 9           | F   | 64                 | MACS                  | 5.6           | 59           | 0.7           | NA           | 3.2x2.8x3.7             | 33.2        | 2.4x2.6x3.9 | 24.3        | WT           |
| 10          | F   | 56                 | Overt CS              | 8.0           | 104          | 4.1           | 4            | 2.7x2.9x2.8             | 21.9        | 3.5x3.8x3.1 | 41.2        | WT           |
| 11          | F   | 58                 | Overt CS              | 4.3           | 151          | 5.6           | <2           | 2.2x3.1                 |             | 3.1x2.0     |             | MUT          |
| 12          | F   | 60                 | Overt CS              | 25.1          | 232          | 4.32          | 3            | 3.8x2x1.5               | 11.4        | 5.6x2.5x4.6 | 64.4        | WT           |
| 13          | F   | 69                 | Overt CS              | 12.5          | 80           | 4.8           | <2           | 5.4x2.0x5.6             | 60.5        | 2.8x1.7x2.7 | 15.6        | MUT          |
| 14          | F   | 58                 | MACS                  | 4.0           | 80           | 8.0           | 4            | 2.8x2.3x4.0             | 25.8        | 2.0x2.0x4.0 | 16          | WT           |
| 15          | F   | 55                 | MACS                  | 2.7           | 64.8         | 4.6           | 7            | 2.9x1.7x3.7             | 18.2        | 2.5x0.7x1.8 | 3.2         | NA           |
| 16          | F   | 55                 | MACS                  | 5.5           | 21.3         | 3.6           | <5           | 3.8x4.7x3.4             | 60.7        | 2.0x2.3x3.1 | 14.3        | MUT          |
| 17          | F   | 77                 | Overt CS              | 8.8           | 36.8         | 1.6           | 6.3          | 3.3x2.6x3.0             | 25.7        | 2.8x1.9x2.7 | 14.4        | MUT          |

Abbreviations: CS, Cushing's Syndrome; MACS, mild autonomous Cushing's Syndrome; ACTH: Adrenocorticotrophic hormone (normal range: 10-50pg/ml); UFC: 24h urinary free cortisol measurement (normal range: 50-150µg/24h); LNSLC: late-night salivary cortisol (normal range: <1.5ng/ml); LDDST: Low Dose Dexamethasone Suppression Test (normal range: <1.8µg/dl).

**Supplementary Table S3.1 Concentrations (ng/mL) of steroids of adrenal veins and peripheral vein quantified by LC-MS/MS.**

| Pat.<br>Nr. | aldosterone |        |            | cortisol |       |            | cortisone |       |            | corticosterone |       |            | 11-deoxycortisol |        |            |
|-------------|-------------|--------|------------|----------|-------|------------|-----------|-------|------------|----------------|-------|------------|------------------|--------|------------|
|             | Left        | Right  | Peripheral | Left     | Right | Peripheral | Left      | Right | Peripheral | Left           | Right | Peripheral | Left             | Right  | Peripheral |
| 1           | 0.10        | 0.09   | 0.01       | 238      | 253   | 59         | 11        | 13    | 13         | 11.8           | 10.1  | 0.7        | 17.90            | 22.50  | 1.32       |
| 2           | 0.597       | 0.11   | 0.02       | 962      | 429   | 182        | 27        | 22    | 16         | 105.4          | 15.3  | 5.2        | 52.80            | 9.64   | 1.30       |
| 3           | 0.00        | 0.05   | 0.01       | 455      | 280   | 149        | 26        | 23    | 7          | 16.5           | 12.3  | 1.9        | 5.32             | 4.62   | 0.17       |
| 4           | 0.0011      | 0.0011 | No Peak    | 640      | 377   | 168        | 30        | 35    | 11         | 183.2          | 102.0 | 17.0       | 22.20            | 17.30  | 1.75       |
| 5           | 1.52        | 0.0011 | 0.00       | 180      | 811   | 158        | 19        | 28    | 16         | 22.8           | 110.0 | 9.2        | 4.95             | 18.10  | 1.08       |
| 6           | 0.96        | 1.14   | 0.02       | 3000     | 3620  | 109        | 103       | 104   | 15         | 155.0          | 215.0 | 1.5        | 115.00           | 157.00 | 1.02       |
| 7           | 0.0136      | 0.114  | No peak    | 383      | 10    | 102        | 20        | 47    | 15         | 13.6           | 72.1  | 1.3        | 3.87             | 16.70  | 0.29       |
| 8           | 1.76        | 0.79   | 0.0476     | 1600     | 404   | 104        | 93        | 38    | 18         | 115.0          | 34.4  | 2.0        | 23.00            | 4.93   | 0.40       |
| 9           | 0.02        | 0.20   | No Peak    | 1280     | 245   | 135        | 48        | 18    | 19         | 111.4          | 38.4  | 2.3        | 40.80            | 12.20  | 0.75       |
| 10          | 0.07        | 0.60   | 0.08       | 292      | 1060  | 117        | 30        | 62    | 16         | 13.4           | 185.9 | 1.8        | 7.26             | 49.75  | 0.62       |
| 11          | 1.12        | 0.22   | 0.04       | 606      | 265   | 162        | 50        | 30    | 21         | 34.4           | 8.8   | 2.6        | 9.04             | 3.20   | 0.56       |
| 12          | 0.17        | 0.20   | < 0.028    | 202      | 247   | 93         | 16        | 13    | 17         | 3.6            | 4.2   | 0.4        | 9.85             | 15.92  | 0.97       |
| 13          | 0.10        | 0.24   | < 0.028    | 318      | 280   | 135        | 30        | 28    | 15         | 105.5          | 88.0  | 20.3       | 7.59             | 5.83   | 0.81       |
| 14          | 0.08        | 0.08   | < 0.028    | 289      | 185   | 92         | 26        | 21    | 18         | 13.4           | 5.6   | 0.8        | 6.80             | 2.84   | 0.28       |
| 15          | 0.45        | 0.45   | 0.08       | 651      | 572   | 163        | 57        | 45    | 22         | 52.4           | 47.6  | 4.5        | 13.28            | 12.85  | 0.60       |
| 16          | 0.03        | 0.16   | <0.01      | 333      | 216   | 86         | 30        | 20    | 13         | 30.6           | 18.1  | 2.4        | 4.96             | 3.96   | 0.37       |
| 17          | 1.49        | 0.124  | 0.0183     | 725      | 71    | 74         | 69        | 12    | 13         | 34.4           | 0.7   | 0.5        | 10.50            | 0.42   | 0.29       |

**Supplementary Table 3.2 Concentrations (ng/mL) of steroids of adrenal veins and peripheral vein quantified by LC-MS/MS.**

| Pat.<br>Nr. | 21-deoxycortisol |           |            | DHEAS |       |            | estradiol  |            |            | testosterone |       |            | androstenedione |       |            |
|-------------|------------------|-----------|------------|-------|-------|------------|------------|------------|------------|--------------|-------|------------|-----------------|-------|------------|
|             | Left             | Right     | Peripheral | Left  | Right | Peripheral | Left       | Right      | Peripheral | Left         | Right | Peripheral | Left            | Right | Peripheral |
| 1           | 1.30             | 1.09      | 0.09       | 2250  | 3010  | 2740       | 0.02       | 0.03       | 0.02       | 0.60         | 0.50  | 0.35       | 36.70           | 29.50 | 1.66       |
| 2           | 0.39             | 1.65      | 0.61       | 273   | 282   | 259        | 0.00       | 0.00       | No Peak    | 0.30         | 0.22  | 0.12       | 20.70           | 13.00 | 2.23       |
| 3           | 1.82             | 1.36      | 0.22       | 440   | 511   | 369        | 0.09       | 0.08       | 0.07       | 0.10         | 0.13  | 0.05       | 4.47            | 4.82  | 0.76       |
| 4           | 0.24             | 10.90     | 2.55       | 72    | 69    | 62         | 0.01       | 0.01       | 0.01       | 1.61         | 1.51  | 2.10       | 1.98            | 3.08  | 0.29       |
| 5           | 2.60             | 11.90     | 1.00       | 470   | 560   | 459        | 0.00       | 0.00       | No Peak    | 0.26         | 0.55  | 0.16       | 9.29            | 12.10 | 0.79       |
| 6           | 16.40            | 22.50     | 0.18       | 531   | 514   | 272        | 0.01       | 0.00       | 0.02       | 0.71         | 1.25  | 0.15       | 77.60           | 88.90 | 0.49       |
| 7           | 0.06             | 0.32      | 0.03       | 879   | 970   | 735        | 0.00       | 0.0014     | 0.00       | 0.26         | 0.45  | 0.20       | 7.57            | 26.2  | 0.50       |
| 8           | 11.80            | 3.91      | 0.25       | 115   | 150   | 119        | 0.05       | 0.07       | 0.0705     | 0.16         | 0.09  | 0.06       | 7.96            | 3.05  | 0.27       |
| 9           | 0.13             | 0.18      | 0.04       | 71    | 68    | 69         | 0.00       | 0.01       | 0.00       | 0.20         | 0.17  | 0.13       | 7.07            | 5.54  | 0.27       |
| 10          | 0.31             | 2.64      | 0.08       | 232   | 285   | 215        | <<br>0.004 | <<br>0.004 | < 0.004    | 0.10         | 0.27  | 0.07       | 5.12            | 15.72 | 0.34       |
| 11          | 0.40             | 0.13      | < 0.04     | 346   | 263   | 233        | <<br>0.004 | <<br>0.004 | < 0.004    | 0.33         | 0.19  | 0.18       | 14.02           | 4.10  | 0.68       |
| 12          | < 0.04           | <<br>0.04 | < 0.04     | 1136  | 911   | 908        | <<br>0.004 | 0.03       | < 0.004    | 0.45         | 0.34  | 0.22       | 7.31            | 14.23 | 1.01       |
| 13          | 0.34             | 0.21      | 0.05       | 48    | 45    | 41         | <<br>0.004 | <<br>0.004 | < 0.004    | 0.03         | 0.03  | 0.03       | 0.83            | 1.14  | 0.08       |
| 14          | 0.18             | 0.06      | < 0.04     | 293   | 257   | 239        | 0.12       | 0.02       | 0.06       | 0.14         | 0.07  | 0.07       | 5.87            | 2.29  | 0.31       |
| 15          | 0.08             | <<br>0.04 | < 0.04     | 238   | 209   | 183        | 0.04       | <<br>0.004 | 0.01       | 0.39         | 0.40  | 0.20       | 15.09           | 10.24 | 0.58       |
| 16          | 0.05             | 0.12      | 0.02       | <100  | <100  | <100       | <0.03      | <0.03      | <0.03      | 0.12         | 0.08  | 0.05       | 3.75            | 4.58  | 0.17       |
| 17          | 0.28             | 0.02      | 0.03       | 475   | 291   | 335        | <0.03      | <0.03      | <0.03      | 0.27         | 0.17  | 0.11       | 12.50           | 0.42  | 0.34       |

**Supplementary Table 3.3 Concentrations (ng/mL) of steroids of adrenal veins and peripheral vein quantified by LC-MS/MS.**

| Pat. Nr. | DHEA  |       |            | dihydrotestosterone |         |            | 17-hydroxyprogesterone |       |            | 11-deoxycorticosterone |        |            | progesterone |        |            |
|----------|-------|-------|------------|---------------------|---------|------------|------------------------|-------|------------|------------------------|--------|------------|--------------|--------|------------|
|          | Left  | Right | Peripheral | Left                | Right   | Peripheral | Left                   | Right | Peripheral | Left                   | Right  | Peripheral | Left         | Right  | Peripheral |
| 1        | 12.90 | 6.81  | 1.82       | 0.21                | 0.29    | 0.29       | 4.38                   | 3.00  | 0.31       | 0.76                   | 0.87   | 0.07       | 0.34         | 0.24   | 0.05       |
| 2        | 7.48  | 8.04  | 0.86       | 0.26                | 0.45    | 0.40       | 24.90                  | 2.87  | 0.15       | 7.84                   | 0.64   | 0.10       | 4.86         | 0.26   | 0.01       |
| 3        | 1.99  | 4.31  | 0.26       | 0.53                | 0.31    | 0.24       | 2.18                   | 2.37  | 0.19       | 0.34                   | 0.27   | 0.00       | 0.11         | 0.10   | No Peak    |
| 4        | 1.04  | 0.83  | 0.49       | 0.35                | 0.33    | 0.30       | 3.53                   | 5.98  | 0.69       | 5.29                   | 4.02   | 0.44       | 1.75         | 2.08   | 0.09       |
| 5        | 9.89  | 16.40 | 3.78       | 0.24                | 0.24    | 0.24       | 4.28                   | 12.00 | 0.35       | 0.99                   | 2.04   | 0.14       | 0.47         | 2.26   | 0.05       |
| 6        | 20.60 | 20.60 | 0.33       | 0.04                | 0.04    | 0.04       | 40.20                  | 46.30 | 0.25       | 7.37                   | 11.10  | 0.07       | 4.97         | 7.05   | 0.40       |
| 7        | 10.70 | 23.10 | 0.98       | 0.02                | 0.00    | 0.00       | 2.81                   | 11.00 | 0.29       | 0.23                   | 1.35   | 0.06       | 0.18         | 0.93   | 0.05       |
| 8        | 2.21  | 1.75  | 0.48       | 0.02                | No Peak | 0.14       | 7.60                   | 2.03  | 0.40       | 1.82                   | 0.56   | 0.04       | 1.29         | 1.34   | 0.83       |
| 9        | 1.39  | 3.64  | 0.12       | 0.12                | 0.17    | 0.12       | 5.18                   | 4.27  | 0.11       | 3.39                   | 4.24   | 0.15       | 1.32         | 2.32   | 0.00       |
| 10       | 7.14  | 20.69 | 1.17       | < 0.08              | < 0.08  | < 0.08     | 3.60                   | 40.71 | 0.25       | 0.44                   | 14.71  | 0.04       | 0.11         | 17.50  | < 0.04     |
| 11       | 12.10 | 3.86  | 0.71       | < 0.08              | < 0.08  | < 0.08     | 6.72                   | 2.01  | 0.38       | 0.77                   | 0.26   | 0.04       | 0.32         | < 0.04 | < 0.04     |
| 12       | 3.48  | 3.29  | 0.85       | < 0.08              | < 0.08  | < 0.08     | 1.58                   | 2.92  | 0.18       | 0.37                   | 0.44   | 0.04       | < 0.04       | < 0.04 | < 0.04     |
| 13       | 0.25  | 0.79  | < 0.21     | < 0.08              | < 0.08  | < 0.08     | 3.26                   | 2.27  | 0.23       | 2.42                   | 1.41   | 0.27       | 1.33         | 0.72   | 0.07       |
| 14       | 5.90  | 2.92  | 0.56       | < 0.08              | < 0.08  | < 0.08     | 3.34                   | 1.39  | 0.16       | 0.36                   | 0.15   | 0.03       | < 0.04       | < 0.04 | < 0.04     |
| 15       | 14.19 | 11.97 | 1.42       | < 0.08              | < 0.08  | < 0.08     | 4.82                   | 4.95  | 0.19       | 1.13                   | 1.40   | 0.07       | 0.40         | 0.53   | < 0.04     |
| 16       | 1.76  | 3.12  | 0.16       | < 0.17              | < 0.17  | < 0.17     | 2.21                   | 2.30  | 0.12       | < 0.10                 | < 0.09 | < 0.07     | < 0.08       | < 0.07 | < 0.05     |
| 17       | 12.4  | 0.84  | 0.64       | < 0.17              | < 0.17  | < 0.17     | 8.10                   | 0.19  | 0.10       | 1.16                   | < 0.07 | < 0.07     | 0.73         | < 0.05 | < 0.05     |

**Table S3 Comparison of clinical parameters based on ARMC5 status**

| clinical parameters               | wild-type <i>ARMC5</i> | mutant <i>ARMC5</i> | <i>p</i> value |
|-----------------------------------|------------------------|---------------------|----------------|
| AVol (ml)                         | 75.8[52.2, 160.7]      | 75.0[37.9, 522.0]   | 0.61           |
| LDDST [ $\mu\text{g}/\text{dl}$ ] | 7.6[4.9, 14.8]         | 10.7[5.2, 18.3]     | 0.67           |
| UFC [ $\mu\text{g}/24\text{h}$ ]  | 207[92, 278]           | 80.0[29.1, 499.0]   | 0.25           |
| LNSLC [ng/ml]                     | 4.2[2.6, 7.4]          | 5.1[3.1, 6.8]       | 0.75           |
| ACTH [pg/ml]                      | 3.0[2.5, 4.0]          | 2.3[1.0, 3.8]       | 0.26           |

AVol, adrenal volume; LDDST: Low Dose Dexamethasone Suppression Test; UFC: 24h urinary free cortisol measurement; LNSLC: late-night salivary cortisol; ACTH: Adrenocorticotrophic hormone.
